# Supplementary material for: Barriers and facilitators to implementing evidence-based interventions among third sector organisations: a systematic review
Source: Springer Nature journal article supplement (doi:10.1186/s13012-018-0789-7), 2018-07-30
Supplement: MOESM2 [file 15988098]

### Search strategy via ProQuest

**Databases:** ABI/INFORM Global, Applied Social Sciences Index & Abstracts (ASSIA), International Bibliography of the Social Sciences (IBSS), MEDLINE®, PAIS Index, Policy File Index, Social Services Abstracts, Sociological Abstracts, Worldwide Political Science Abstracts

|    |                                                                                                                                                                                                                                                                                                                                                                                                                                                                                                                                                                                                                                 |
|----|---------------------------------------------------------------------------------------------------------------------------------------------------------------------------------------------------------------------------------------------------------------------------------------------------------------------------------------------------------------------------------------------------------------------------------------------------------------------------------------------------------------------------------------------------------------------------------------------------------------------------------|
| #1 | ALL(“evidence based practice*” OR “evidence-based practice*” OR “evidence-based intervention*” OR “evidence based intervention*” OR EBI* OR EBP* OR “evidence-based program*” OR “evidence based program* OR EBM OR “evidence-based service* OR “evidence based service*” OR evidence-based OR “evidence based”)                                                                                                                                                                                                                                                                                                                |
| #2 | ALL(experience* OR attitude* OR perception* OR learning OR barrier* OR facilitat* OR challenge* OR benefit* OR success* OR constrain* OR difficult* OR enhanc* OR influen* OR interfer* OR motivat* OR obstruct* OR problem* OR promot* OR restrain* OR restrict* OR disincentive* OR factor* OR capacity OR enabler*)                                                                                                                                                                                                                                                                                                          |
| #3 | ALL(implement* OR adapt* OR adopt* OR adher* OR deliver* OR becom*)                                                                                                                                                                                                                                                                                                                                                                                                                                                                                                                                                             |
| #4 | ALL(charity OR charities OR "charitable organisation*" OR "charitable organization*" OR "voluntary sector" OR "voluntary organisation*" OR "voluntary organization*" OR "third sector" OR third-sector OR "community organisation*" OR "community organization*" OR "community-based organisation*" OR "community-based organization*" OR non-profit* OR "not for profit" OR nonprofit* OR non-profit* OR "social enterprise*" OR TSO* OR CBO* OR VCO* OR VCS* OR "civic sector" OR "civil sector " OR "social sector" OR CSO* OR "non government*" OR NGO* OR NPO* OR "civil society" OR community-based OR "community based") |
| #5 | 1 AND 2 AND 3 AND 4                                                                                                                                                                                                                                                                                                                                                                                                                                                                                                                                                                                                             |
